# Supplementary material
Source: Research Square preprint supplement (doi:10.21203/rs.3.rs-9773235/v1)
Supplement: Supplementary file 1 [file efdbcb8d11d5b4c67d09ae12.docx]

**ODA BULTUM UNIVERSITY**

**COLLEGE OF SOCIAL SCIENCE & HUMANITIES**

**DEPARTMENT OF PSYCHOLOGY**

**Questionnaires**

Dear participants, the researcher has developed the innovative behavior scale, school as a learning institution scale and psychological capital scale to collect quantitative data from the study participants to carry out my research entitled: The Relationship Between Psychological Capital and Innovative Behavior of Pre-School Teachers in Town Administrations of West Hararghe Zone, Oromia, Ethiopia. Your genuine and honest response would enhance the quality of my research. Thank you in advance for your support. Should you have any inquiries please reach out to me through the following addresses: Email: [barentuma25@gmail.com](mailto:barentuma25@gmail.com), Phone: +251955033404.

1. **Innovative Behavior Scale**

This scale has three components: Idea generation, idea promotion and idea implementation with total items of 17.

**Instruction:** Please indicate the extent to which you agree with each of the following statements by placing a tick (✓) under the appropriate response category as indicated in the following table (Table 1).

**1 = strongly disagree, 2 = disagree, 3 = neutral, 4 = agree, 5 = strongly agree**

Table 1: Innovative Behavior Scale

| **No.** | **Items** | **1** | **2** | **3** | **4** | **5** |
| --- | --- | --- | --- | --- | --- | --- |
| Idea Generation |  |  |  |  |  |  |
| 1 | I frequently generate new ideas to improve teaching and learning activities. |  |  |  |  |  |
| 2 | I look for creative ways to solve classroom problems. |  |  |  |  |  |
| 3 | I develop new teaching strategies for preschool children. |  |  |  |  |  |
| 4 | I often suggest innovative activities for children’s learning. |  |  |  |  |  |
| 5 | I search for new methods to make lessons more interesting. |  |  |  |  |  |
| 6 | I try to introduce original ideas into classroom instruction. |  |  |  |  |  |
| Idea Promotion |  |  |  |  |  |  |
| 7 | I encourage colleagues to support new educational ideas. |  |  |  |  |  |
| 8 | I discuss innovative teaching methods with other teachers. |  |  |  |  |  |
| 9 | I try to convince school leaders about the usefulness of new ideas. |  |  |  |  |  |
| 10 | I actively share creative instructional practices with coworkers. |  |  |  |  |  |
| 11 | I seek support from others when implementing new ideas. |  |  |  |  |  |
| Idea Implementation |  |  |  |  |  |  |
| 12 | I apply new teaching methods in my classroom practice. |  |  |  |  |  |
| 13 | I transform creative ideas into practical educational activities. |  |  |  |  |  |
| 14 | I participate actively in implementing school improvements. |  |  |  |  |  |
| 15 | I experiment with innovative instructional approaches. |  |  |  |  |  |
| 16 | I successfully implement new ideas to improve children’s learning. |  |  |  |  |  |
| 17 | I continuously improve teaching practices through innovation. |  |  |  |  |  |

**School as a Learning Institution Scale**

School as a learning institution has four components: Shared vision and leadership, collaborative learning and teamwork support, continuous professional learning and supportive learning environment with total items of 21.

**Instruction:** Please refer to the following table (Table 2 below) and indicate your level of agreement with the following statements concerning your school environment.

**1 = strongly disagree, 2 = disagree, 3 = neutral, 4 = agree, 5 = strongly agree**

Table 2: School as a Learning Institution Scale

| **No.** | **Items** | **1** | **2** | **3** | **4** | **5** |
| --- | --- | --- | --- | --- | --- | --- |
| Shared Vision and Leadership Support |  |  |  |  |  |  |
| 1 | My school has a clear vision that promotes continuous learning. |  |  |  |  |  |
| 2 | School leaders encourage teachers to develop professionally. |  |  |  |  |  |
| 3 | Teachers participate in important school decision-making processes. |  |  |  |  |  |
| 4 | The school administration supports innovative teaching practices. |  |  |  |  |  |
| 5 | School leaders encourage collaboration among teachers. |  |  |  |  |  |
| Collaborative Learning and Teamwork |  |  |  |  |  |  |
| 6 | Teachers in this school share professional knowledge openly. |  |  |  |  |  |
| 7 | Teachers work together to solve instructional problems. |  |  |  |  |  |
| 8 | Collaboration among teachers is strongly encouraged in this school. |  |  |  |  |  |
| 9 | Teachers regularly discuss ways to improve teaching practices. |  |  |  |  |  |
| 10 | Teamwork is valued in my school. |  |  |  |  |  |
| Continuous Professional Learning |  |  |  |  |  |  |
| 11 | My school provides opportunities for continuous professional development. |  |  |  |  |  |
| 12 | Teachers are encouraged to attend workshops and training programs. |  |  |  |  |  |
| 13 | Teachers regularly reflect on their teaching practices. |  |  |  |  |  |
| 14 | The school encourages learning from past experiences and mistakes. |  |  |  |  |  |
| 15 | Teachers are motivated to improve their professional competencies. |  |  |  |  |  |
| Supportive Learning Environment |  |  |  |  |  |  |
| 16 | My school creates an environment that supports creativity and innovation. |  |  |  |  |  |
| 17 | Teachers feel psychologically safe to express new ideas. |  |  |  |  |  |
| 18 | The school encourages experimentation with new teaching methods. |  |  |  |  |  |
| 19 | Teachers receive support when trying innovative practices. |  |  |  |  |  |
| 20 | Open communication is encouraged in my school. |  |  |  |  |  |
| 21 | The school promotes a culture of continuous improvement. |  |  |  |  |  |

**Psychological Capital**

**Instruction to Respondents:**

Below are statements describing feelings, attitudes, and behaviors related to your work and personal capacities. Please read each statement carefully and indicate the extent to which you agree or disagree with each statement by placing a tick (✓) in the appropriate column.

**1 = strongly disagree, 2 = disagree, 3 = neutral, 4 = agree, 5 = strongly agree**

**Self-Efficacy**

| **No.** | **Item** | **1** | **2** | **3** | **4** | **5** |
| --- | --- | --- | --- | --- | --- | --- |
| 1 | I feel confident analyzing a long-term problem to find a solution. |  |  |  |  |  |
| 2 | I feel confident in representing my work area during meetings or discussions. |  |  |  |  |  |
| 3 | I feel confident contributing to discussions about organizational strategies. |  |  |  |  |  |
| 4 | I feel confident helping to set goals and objectives in my work. |  |  |  |  |  |
| 5 | I feel confident contacting people outside the organization to discuss problems. |  |  |  |  |  |
| 6 | I feel confident presenting information to a group of colleagues. |  |  |  |  |  |

**Hope**

| **No.** | **Item** | **1** | **2** | **3** | **4** | **5** |
| --- | --- | --- | --- | --- | --- | --- |
| 7 | I can think of many ways to reach my current work goals. |  |  |  |  |  |
| 8 | At the present time, I am energetically pursuing my work goals. |  |  |  |  |  |
| 9 | There are lots of ways around any problem I face at work. |  |  |  |  |  |
| 10 | Right now, I see myself as being quite successful at work. |  |  |  |  |  |
| 11 | I can think of many ways to achieve the goals in my work. |  |  |  |  |  |
| 12 | Even when others get discouraged, I know I can find a way to solve problems. |  |  |  |  |  |

**Resilience**

| **No.** | **Item** | **1** | **2** | **3** | **4** | **5** |
| --- | --- | --- | --- | --- | --- | --- |
| 13 | I usually manage difficulties at work one way or another. |  |  |  |  |  |
| 14 | I can get through difficult times because I have experienced difficulty before. |  |  |  |  |  |
| 15 | When I face setbacks at work, I recover quickly. |  |  |  |  |  |
| 16 | I usually take stressful things at work in stride. |  |  |  |  |  |
| 17 | I can successfully overcome challenges in my work. |  |  |  |  |  |
| 18 | I become stronger after overcoming work-related hardships. |  |  |  |  |  |

**Optimism**

| **No.** | **Item** | **1** | **2** | **3** | **4** | **5** |
| --- | --- | --- | --- | --- | --- | --- |
| 19 | I always look on the bright side of things regarding my work. |  |  |  |  |  |
| 20 | I am optimistic about what will happen to me in the future at work. |  |  |  |  |  |
| 21 | I expect good things to happen to me in my work. |  |  |  |  |  |
| 22 | I usually expect the best in uncertain work situations. |  |  |  |  |  |
| 23 | Things generally work out positively for me at work. |  |  |  |  |  |
| 24 | I approach my work with a positive attitude even during challenges. |  |  |  |  |  |

**ODA BULTUM UNIVERSITY**

**COLLEGE OF SOCILA SCIENCE & HUMANITIES**

**DEPARTMENT OF PSYCHOLOGY**

**Interview Guide**

**Dear esteemed participant,**

Thank you for agreeing to participate in this interview. The purpose of this interview is to gather detailed information regarding preschool teachers’ psychological capital and innovative behavior in educational settings. Your responses will help generate valuable insights for academic and practical purposes. The interview is strictly for research purposes. All information you provide will remain confidential and anonymous. You are free to refuse to answer any question or withdraw from the interview at any time.

**NB: Estimated interview time: 30 – 45 minutes.**

**Section I: Background Information**

- Please tell me about yourself and your professional background.
  - Age
  - Sex
  - Educational qualification
  - Teaching experience
  - Current position
- How long have you been working as a preschool teacher?
- What motivated you to join the preschool teaching profession?
- Can you briefly describe your daily teaching responsibilities?

**Section II: Innovative Behavior**

1. What does innovative behavior mean to you in the context of preschool teaching?
2. Can you describe innovative teaching methods or practices you have used?
3. How often do teachers in your school introduce new ideas or teaching approaches?
4. What motivates teachers to implement innovative practices?
5. What challenges hinder teachers from being innovative?
6. How does school leadership encourage or discourage innovation?
7. Can you provide examples of successful innovations implemented in your school?
8. How do students respond to innovative teaching practices?

**Section III: School Environment and Organizational Support**

1. How supportive is your school environment for learning and innovation?
2. What role does collaboration among teachers play in promoting innovation?
3. How does professional development training influence teachers’ innovative behavior?
4. Does your school encourage teamwork, knowledge sharing, and creativity? Please explain.
5. What resources are necessary to improve innovative behavior among preschool teachers?

**Closing Statement**

Thank you very much for your valuable time, cooperation, and contributions. Your responses are highly important for the success of this research.

If you have any question: email: [barentuma25@gmail.com](mailto:barentuma25@gmail.com), Phone: +251955033404

**Interviewer Notes Section**

- Date of Interview: __________________________
- Place of Interview: _________________________
- Duration of Interview: ______________________
- Interviewer Name: __________________________
- Participant Code: __________________________
